# Supplementary material for: Acid Ceramidase Inhibitor LCL-805 Antagonizes Akt Signaling and Promotes Iron-Dependent Cell Death in Acute Myeloid Leukemia
Source: MDPI journal article supplement (doi:10.3390/cancers15245866), 2023-12-15
Supplement: s1 [file s1]

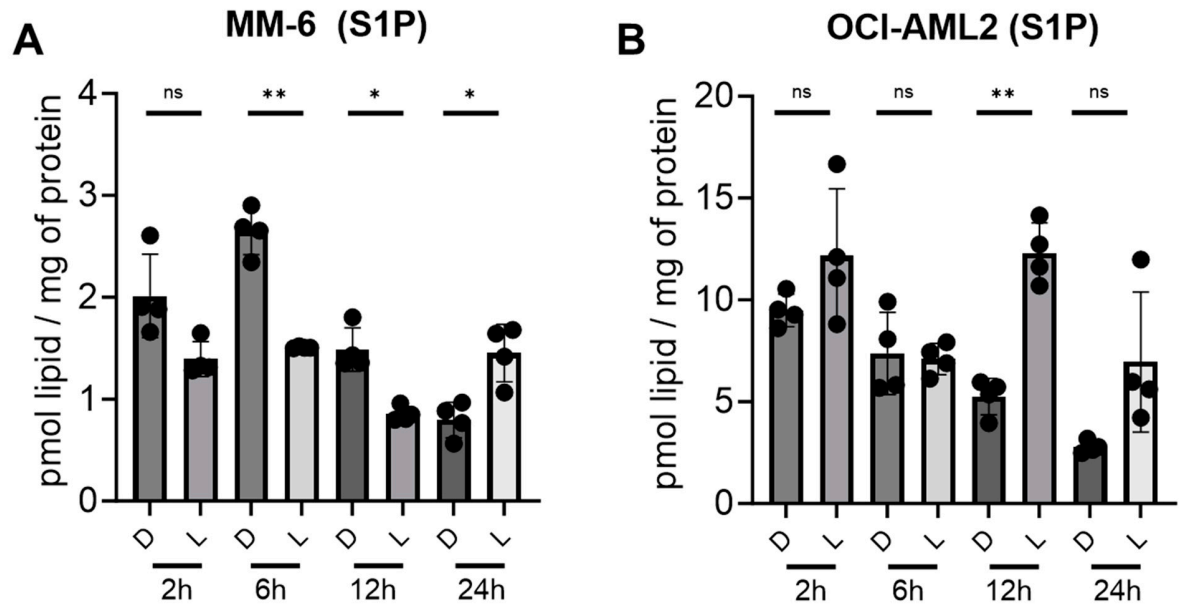

**Figure S1.** Effect of LCL-805 on sphingosine-1-phosphate levels. Sphingolipid profiling of MM-6 (A) and OCI-AML2 (B) cells treated with vehicle (DMSO) or LCL-805 (15  $\mu$ M) for the indicated times. Levels of sphingosine-1-phosphate were evaluated by liquid chromatography mass spectrometry. Bars represent the average of four technical replicates from a representative experiment. Error bars represent  $\pm$  standard deviation. Statistical analyses represent Welch's ANOVA with Dunnett's T3 multiple comparisons test. \*  $p < 0.05$ , \*\*  $p < 0.005$ , ns = non-significant. D = DMSO; L = LCL-805.

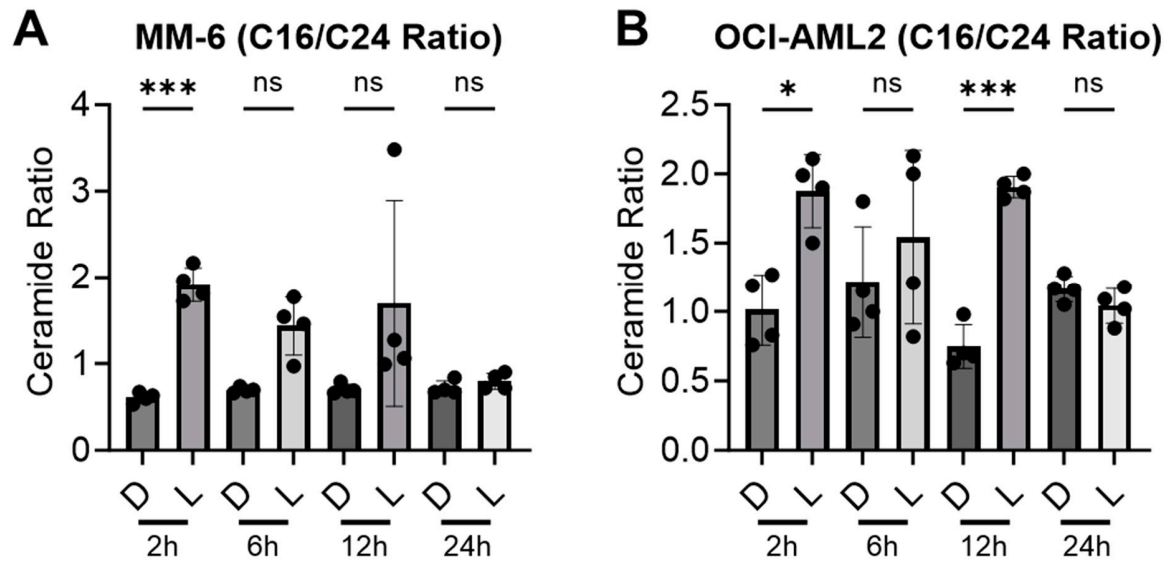

**Figure S2.** LCL-805 increased the C16-/C24-ceramide ratio. Sphingolipid profiling of MM-6 (A) and OCI-AML2 (B) cells treated with vehicle (DMSO) or LCL-805 (15  $\mu$ M) for the indicated times. Levels of ceramide were evaluated by liquid chromatography mass spectrometry. Bars represent the average of four technical replicates from a representative experiment. Error bars represent +/- standard deviation. Statistical analyses represent Welch's ANOVA with Dunnett's T3 multiple comparisons test. \*  $p < 0.05$ , \*\*\*  $p < 0.001$ , ns = non-significant. D = DMSO; L = LCL-805. C## = fatty acid chain length.

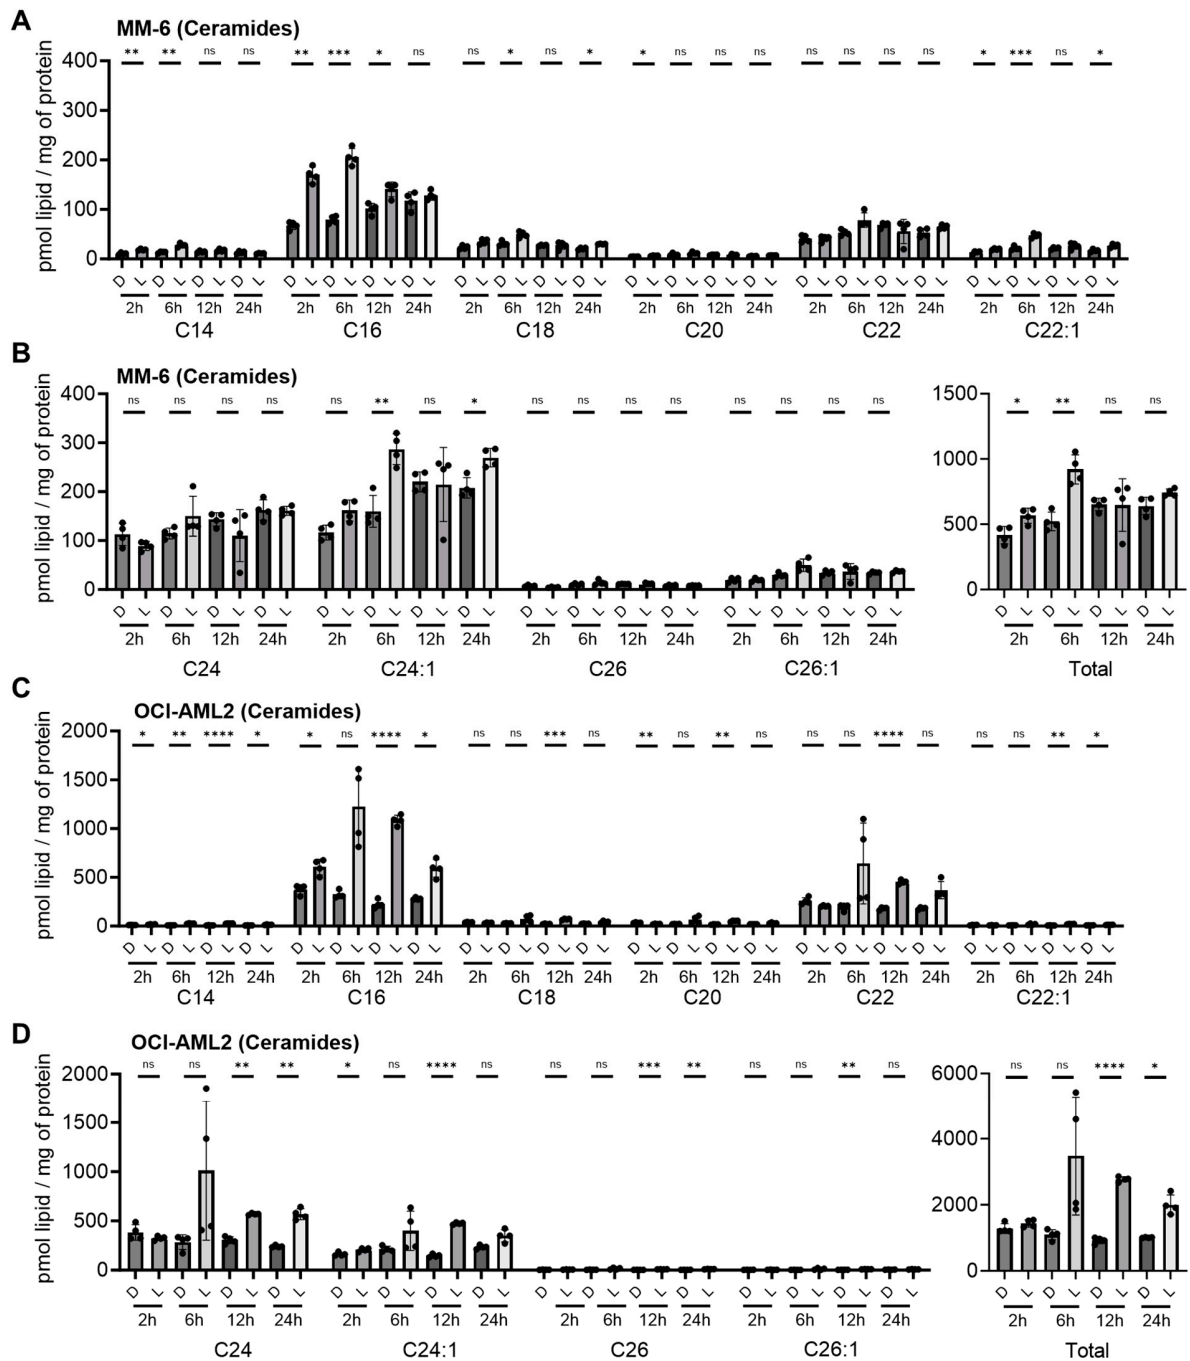

**Figure S3.** Effect of LCL-805 on ceramide levels. Sphingolipid profiling of MM-6 (A,B) and OCI-AML2 (C,D) cells treated with vehicle (DMSO) or LCL-805 (15  $\mu$ M) for the indicated times. Levels of ceramide were evaluated by liquid chromatography mass spectrometry. Bars represent the average of four technical replicates from a representative experiment. Error bars represent  $\pm$  standard deviation. Statistical analyses represent Welch's ANOVA with Dunnett's T3 multiple comparisons test. \*  $p < 0.05$ , \*\*  $p < 0.005$ , \*\*\*  $p < 0.001$ , \*\*\*\*  $p < 0.0001$ , ns = non-significant. D = DMSO; L = LCL-805. C## = fatty acid chain length. Total = sum of sphingolipid species.

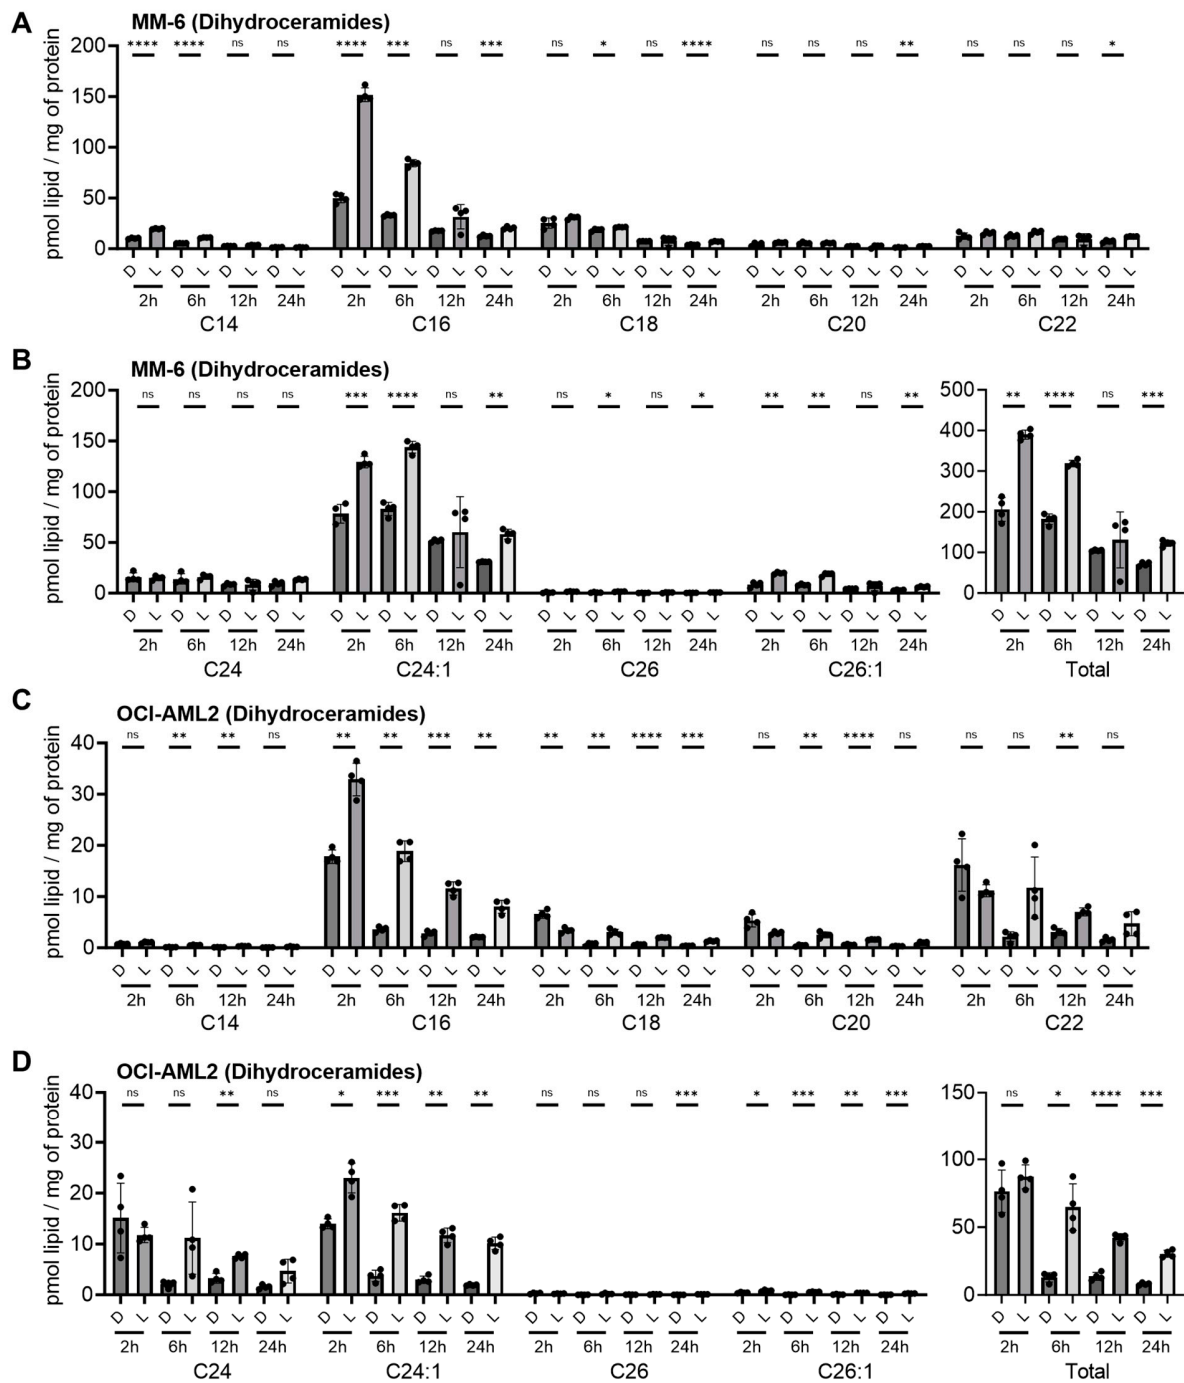

**Figure S4.** Effect of LCL-805 on dihydroceramide levels. Sphingolipid profiling of MM-6 (A,B) and OCI-AML2 (C,D) cells treated with vehicle (DMSO) or LCL-805 (15  $\mu$ M) for the indicated times. Levels of dihydroceramide were evaluated by liquid chromatography mass spectrometry. Bars represent the average of four technical replicates from a representative experiment. Error bars represent  $\pm$  standard deviation. Statistical analyses represent Welch's ANOVA with Dunnett's T3 multiple comparisons test. \*  $p < 0.05$ , \*\*  $p < 0.005$ , \*\*\*  $p < 0.001$ , \*\*\*\*  $p < 0.0001$ , ns = non-significant. D = DMSO; L = LCL-805. C## = fatty acid chain length. Total = sum of sphingolipid species.

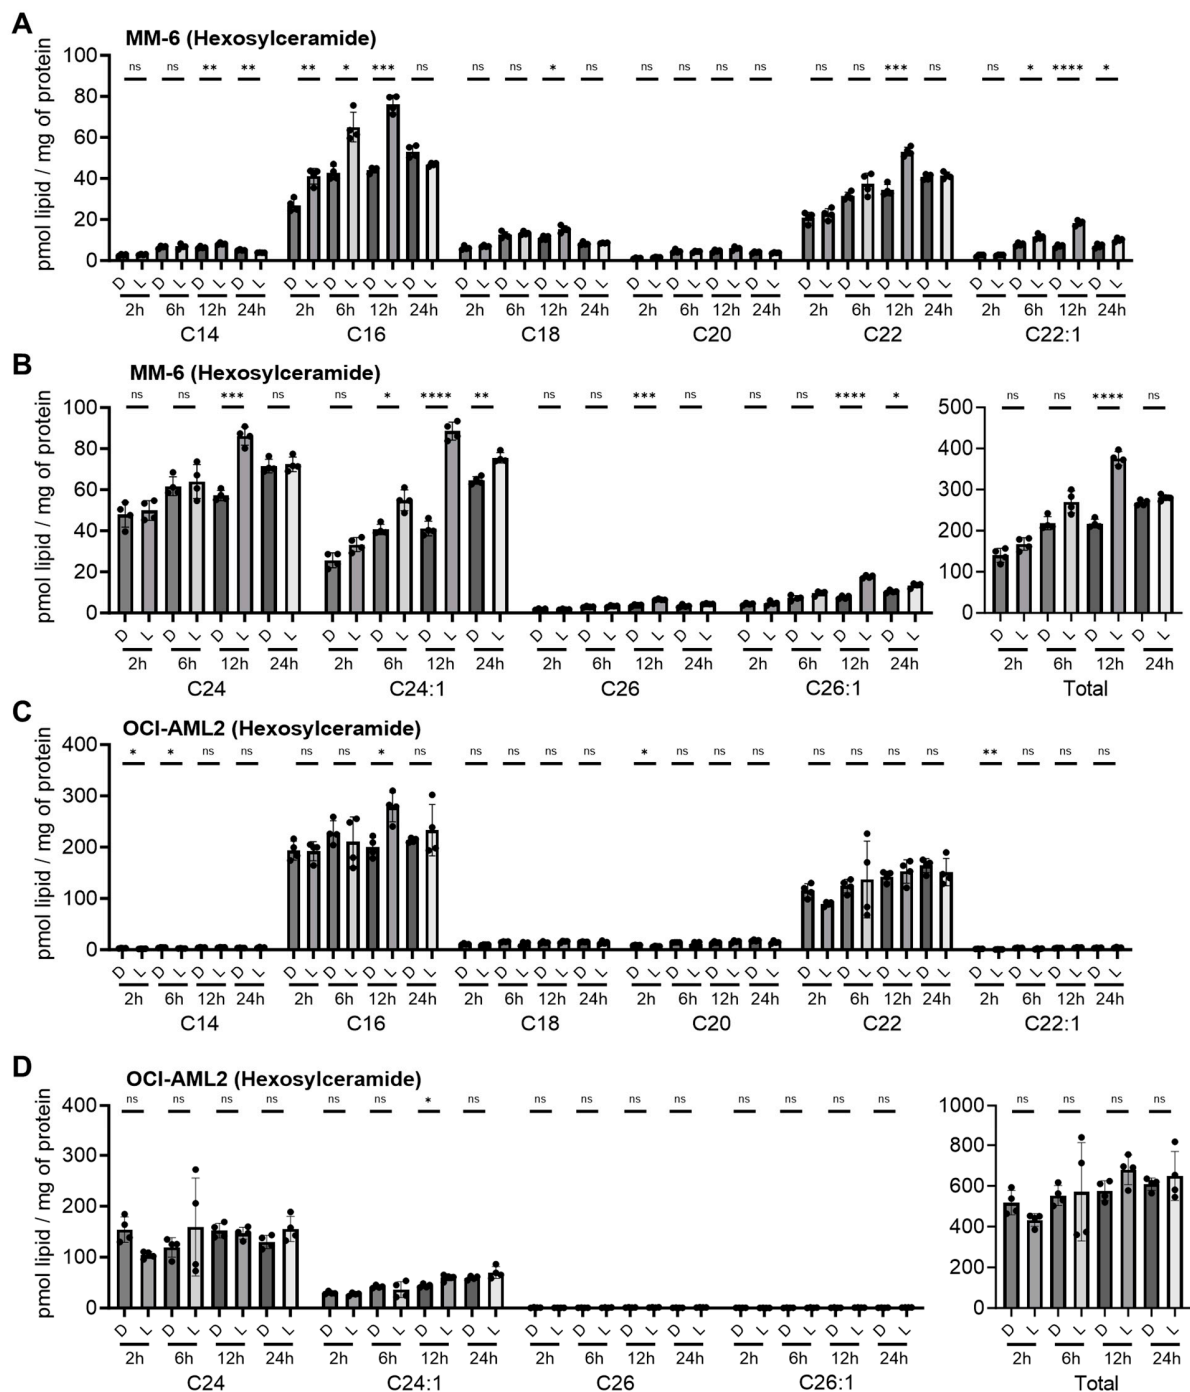

**Figure S5.** Effect of LCL-805 on hexosylceramide levels. Sphingolipid profiling of MM-6 (A,B) and OCI-AML2 (C,D) cells treated with vehicle (DMSO) or LCL-805 (15  $\mu$ M) for the indicated times. Levels of hexosylceramide were evaluated by liquid chromatography mass spectrometry. Bars represent the average of four technical replicates from a representative experiment. Error bars represent  $\pm$  standard deviation. Statistical analyses represent Welch's ANOVA with Dunnett's T3 multiple comparisons test. \*  $p < 0.05$ , \*\*  $p < 0.005$ , \*\*\*  $p < 0.001$ , \*\*\*\*  $p < 0.0001$ , ns = non-significant. D = DMSO; L = LCL-805. C## = fatty acid chain length. Total = sum of sphingolipid species.

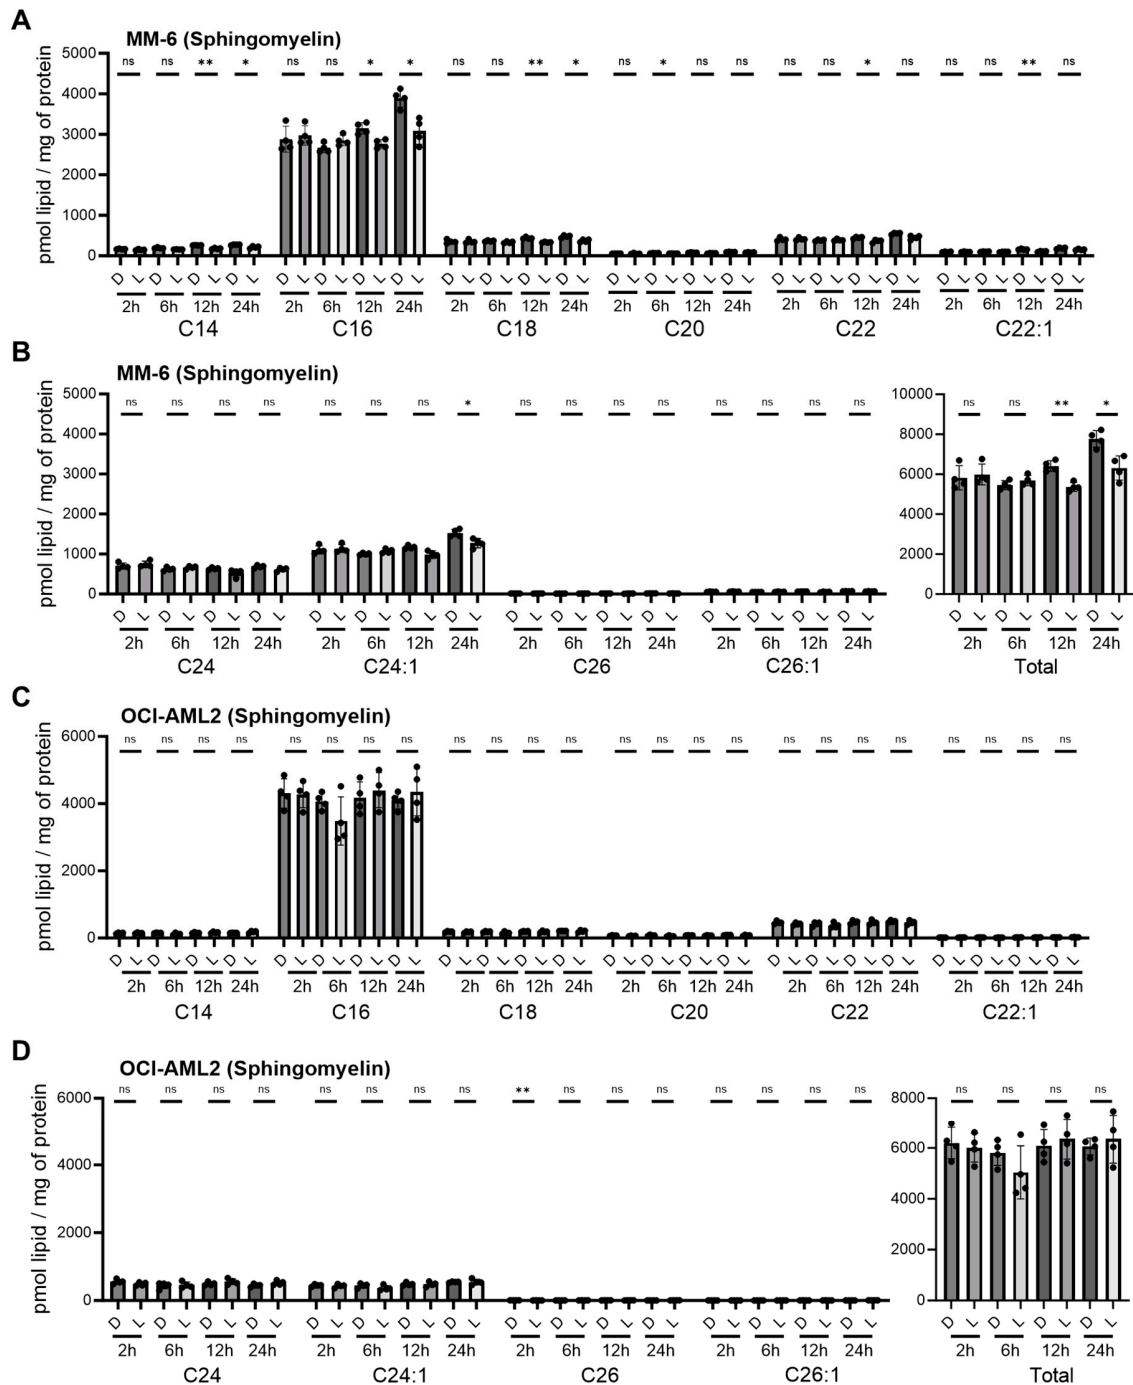

**Figure S6.** Effect of LCL-805 on sphingomyelin levels. Sphingolipid profiling of MM-6 (A,B) and OCI-AML2 (C,D) cells treated with vehicle (DMSO) or LCL-805 (15  $\mu$ M) for the indicated times. Levels of sphingomyelin were evaluated by liquid chromatography mass spectrometry. Bars represent the average of four technical replicates from a representative experiment. Error bars represent  $\pm$  standard deviation. Statistical analyses represent Welch's ANOVA with Dunnett's T3 multiple comparisons test. \*  $p < 0.05$ , \*\*  $p < 0.005$ , ns = non-significant. D = DMSO; L = LCL-805. C## = fatty acid chain length. Total = sum of sphingolipid species.

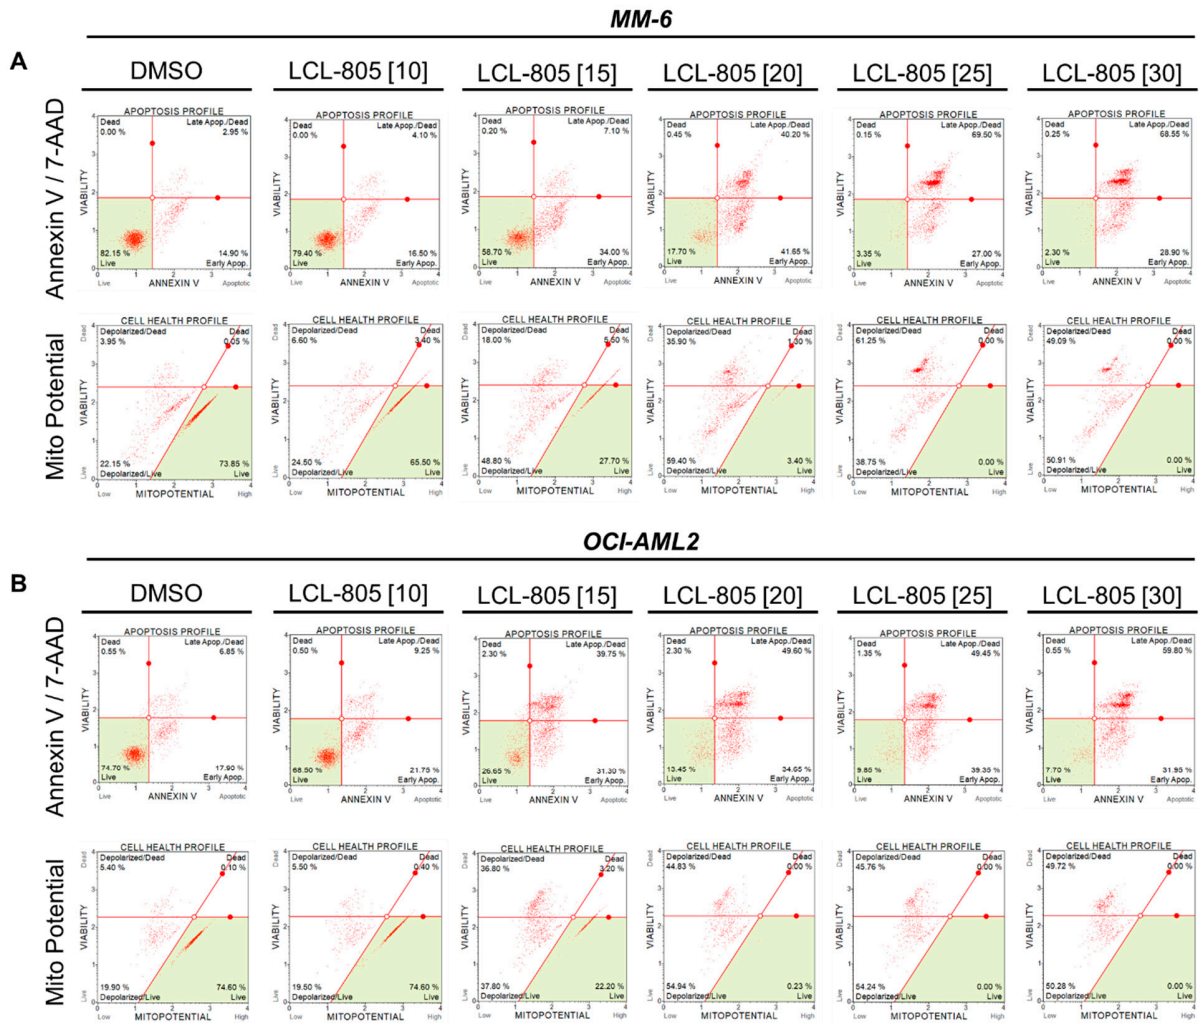

**Figure S7.** Flow cytometry-based detection of phosphatidylserine externalization and mitochondrial depolarization with LCL-805 treatment. MM-6 (A) and OCI-AML2 (B) were treated for 24 hours with vehicle (DMSO) or the indicated concentrations of LCL-805 (in  $\mu$ M, shown in brackets). Representative flow cytometry panels for the annexin V/7-AAD and mitochondrial depolarization assays are depicted. Data presented are representative experiments with at least three technical replicates, which were used to create Figure 4.



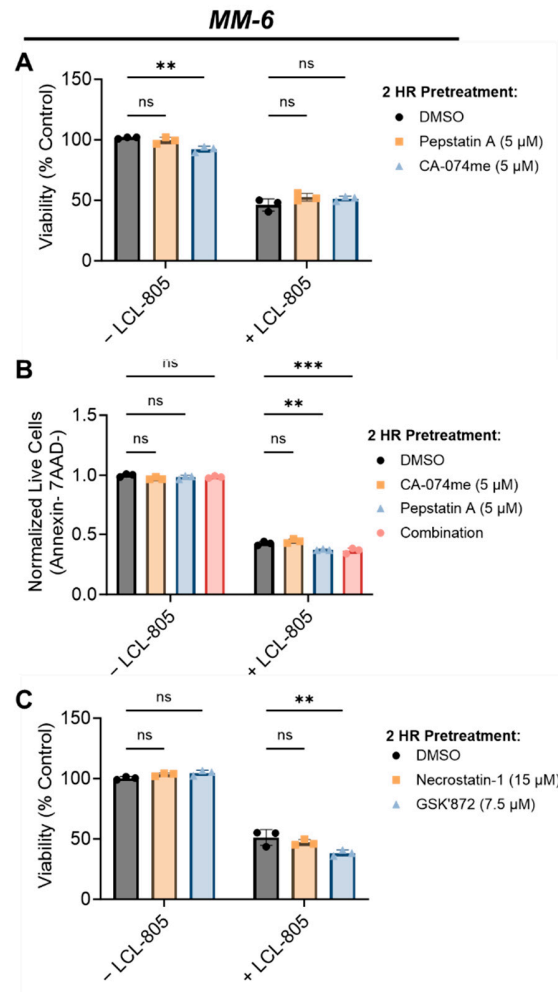

**Figure S8.** Inhibiting lysosomal cathepsins or necroptosis did not rescue LCL-805-mediated cytotoxicity.

(A) Cell viability was determined by MTS assay of MM-6 cells pretreated with vehicle (DMSO), or lysosomal cathepsin inhibitors pepstatin A (5  $\mu$ M), or CA-074me (5  $\mu$ M) for 2 hours and subsequently treated with DMSO or LCL-805 (15  $\mu$ M) for 24 hours. (B) Normalized live cell number by annexin and 7AAD flow cytometry of MM-6 cells pretreated with vehicle (DMSO), pepstatin A (5  $\mu$ M), CA-074me (5  $\mu$ M), or the combination for 2 hours and subsequently treated with DMSO or LCL-805 (15  $\mu$ M) for 6 hours. (C) Cell viability was determined by MTS assay of MM-6 cells pretreated with vehicle (DMSO), or necroptosis inhibitors necrostatin-1 (15  $\mu$ M), or GSK'872 (7.5  $\mu$ M) for 2 hours and subsequently treated with DMSO or LCL-805 (15  $\mu$ M) for 24 hours. Bars represent the average of three technical replicates from a representative experiment. Error bars represent  $\pm$  standard deviation. Statistical analyses represent two-way ANOVA with Tukey's multiple comparisons test. \*\*  $p < 0.005$ , \*\*\*  $p < 0.001$ , ns = non-significant.



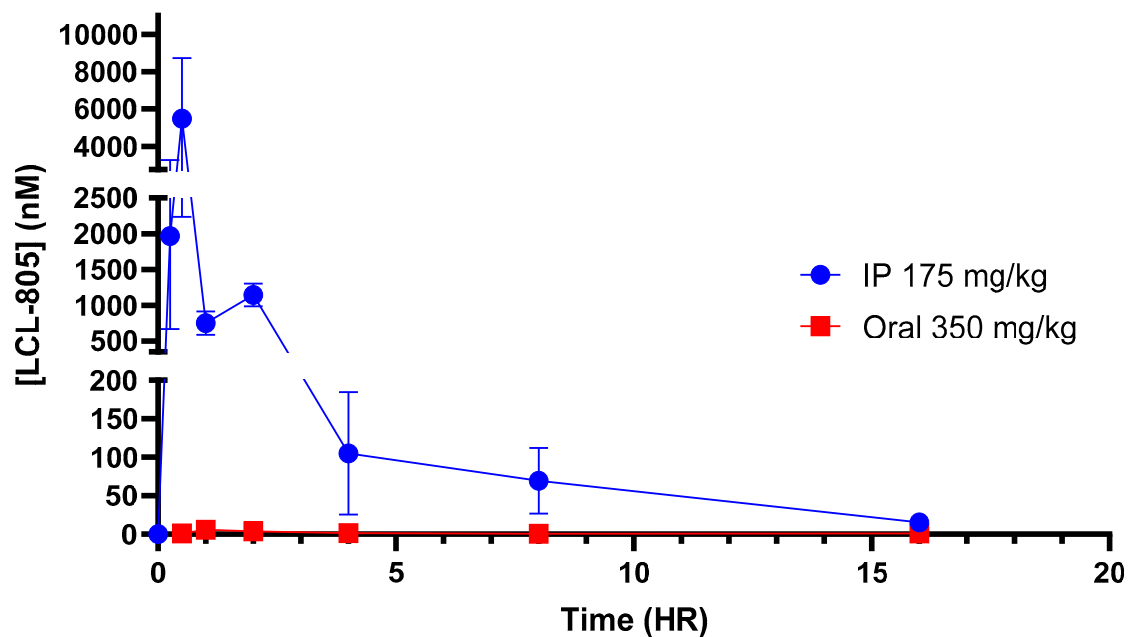

**Figure S9.** LCL-805 pharmacokinetics. B6(Cg)-Tyrc-2J/J (Albino B6) mice (The Jackson Laboratory, Bar Harbor, ME, USA) were given a single treatment of LCL-805 dissolved in saline at 300 mg/kg orally or 175 mg/kg intraperitoneally (n=3-5/group). Blood was collected via cardiac puncture at the indicated time points and LCL-805 levels were quantified via mass spectrometry. LCL-805 was most effectively delivered intraperitoneally due to rapid clearance following oral delivery and tail vein necrosis following intravenous injections. In a pilot study to test LCL-805 tolerability upon repeat dosing, 5–7-week-old male NOD.Cg-Rag1tm1Mom Il2rgtm1Wjl Tg (CMV-IL3,CSF2,KITLG)1Eav/J (NRG-S) mice (The Jackson Laboratory, Bar Harbor, ME, USA) exhibited severe toxicity and mortality with 2-3 intraperitoneal treatments of 90 mg/kg/day and 175 mg/kg/day. However, an intraperitoneal LCL-805 treatment with 40 mg/kg was well-tolerated by NRG-S mice treated once a day for five days (M-F) followed by a two-day break for two weeks. Therefore, LCL-805 was administered at 40 mg/kg intraperitoneally for in vivo efficacy studies using AML cell line-derived xenograft (CDX) mouse models. All animal experiments were conducted at the Penn State University College of Medicine under protocols approved by the Institutional Animal Care and Use Committee at Penn State, Hershey, PA, USA (IACUC #PROTO201246746). Error bars represent +/- standard deviation.

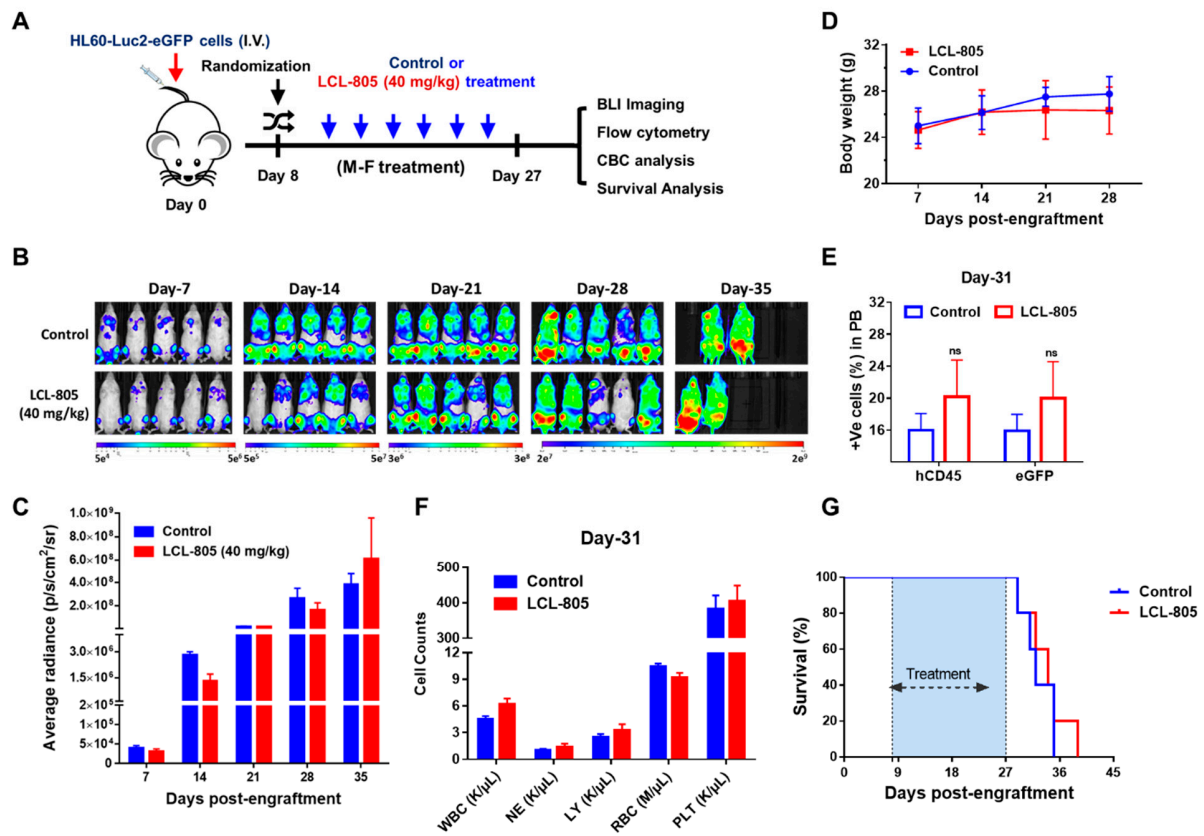

**Figure S10.** Lack of LCL-805 efficacy in an AML cell line-derived xenograft (CDX) mouse model. (A)  $2 \times 10^6$  HL-60-Luc2-eGFP cells (HL-60 cells transduced with pFU-LUC2-eGFP lentivector and sorted for EGFP; plasmid gifted by Drs. Sanjiv Sam Gambhir and Tzuhua Dennis Lin) were injected intravenously into 5–7-week-old male NOD.Cg-Rag1tm1Mom Il2rgtm1Wjl Tg (CMV-IL3,CSF2,KITLG)1Eav/J (NRG-S) mice (The Jackson Laboratory, Bar Harbor, ME, USA) and randomized into control or LCL-805 groups ( $n=5$ ) based on bioluminescence imaging (BLI) signals. LCL-805 dissolved in saline was administered intraperitoneally (40 mg/kg) once a day for five days (M-F) followed by a two-day break for 3 weeks. (B) Bioluminescence images of control and LCL-805-treated CDX mice on the indicated days. Animals were imaged using the IVIS Lumina LT Series III imaging system (Perkin Elmer, Waltham, MA, USA) 7 min after D-luciferin (Gold Biotechnology, St. Louis, MO, USA) injection (150 mg/kg; IP). (C) Quantified BLI signals measured over time. Photons emitted were quantified, analyzed, and plotted as average radiance (photons/s/cm<sup>2</sup>/steradian), using the Living Image software 4.8 (Perkin Elmer, Waltham, MA, USA). (D) Weights (g) of the control and LCL-805-treated mice over time. Values are represented as the mean  $\pm$  standard deviation. (E) Leukemic burden assessed from peripheral blood on day 31 post-engraftment by flow cytometry staining for human CD45 and GFP markers (GFP expression (FITC), anti-human CD45-PE (BD Biosciences, Franklin Lakes, NJ, USA, #555483)), anti-mouse CD45-BV650 (BD Biosciences, #563410), and dead cell exclusion dye, 7-AAD (BioLegend, San Diego, CA, USA, #420404). Data were acquired using the BD LSRFortessa Flow Cytometer (BD Biosciences) at the Core Facility of Pennsylvania State University College of Medicine (RRID:SCR\_021134) and processed using FlowJo v10.0 (BD Biosciences). (F) Complete blood count analysis from CDX mouse peripheral blood on day 31 post-engraftment of leukocytes (WBC = white blood cell; NE = neutrophil; LY = lymphocyte), red blood cells (RBC), and platelets (PLT) using the Hemavet 950 analyzer (Drew Scientific, Miami Lakes, FL, USA). (G) Kaplan–

Meier survival analysis of the LCL-805-treated group versus the control group. All animal experiments were conducted at the Penn State University College of Medicine under protocols approved by the Institutional Animal Care and Use Committee at Penn State, Hershey, PA, USA (IACUC #PROTO201246746). Data are the mean  $\pm$  standard error of the mean. Statistical analyses represent two-way ANOVA. ns = non-significant.

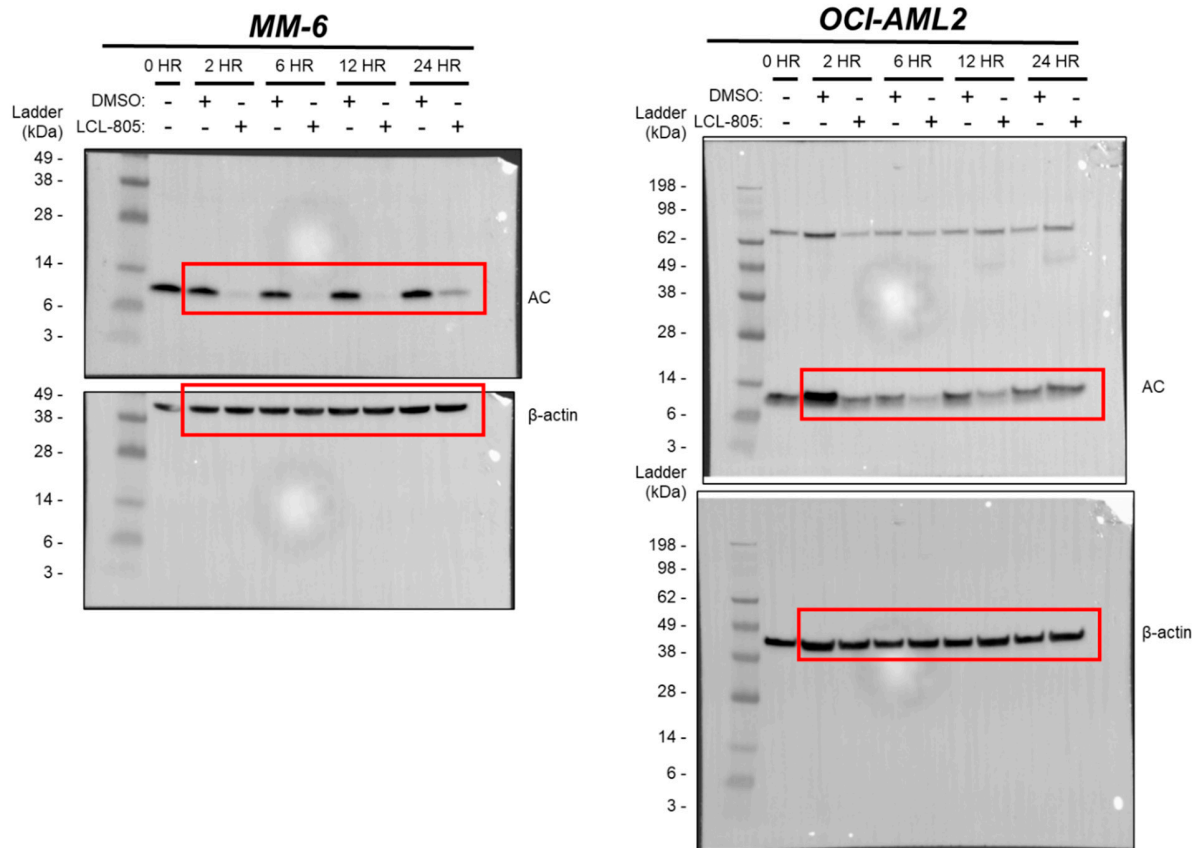

**Figure S11.** Full, annotated, unedited western blots for Figure 1C. Red boxes were cropped for the figure.

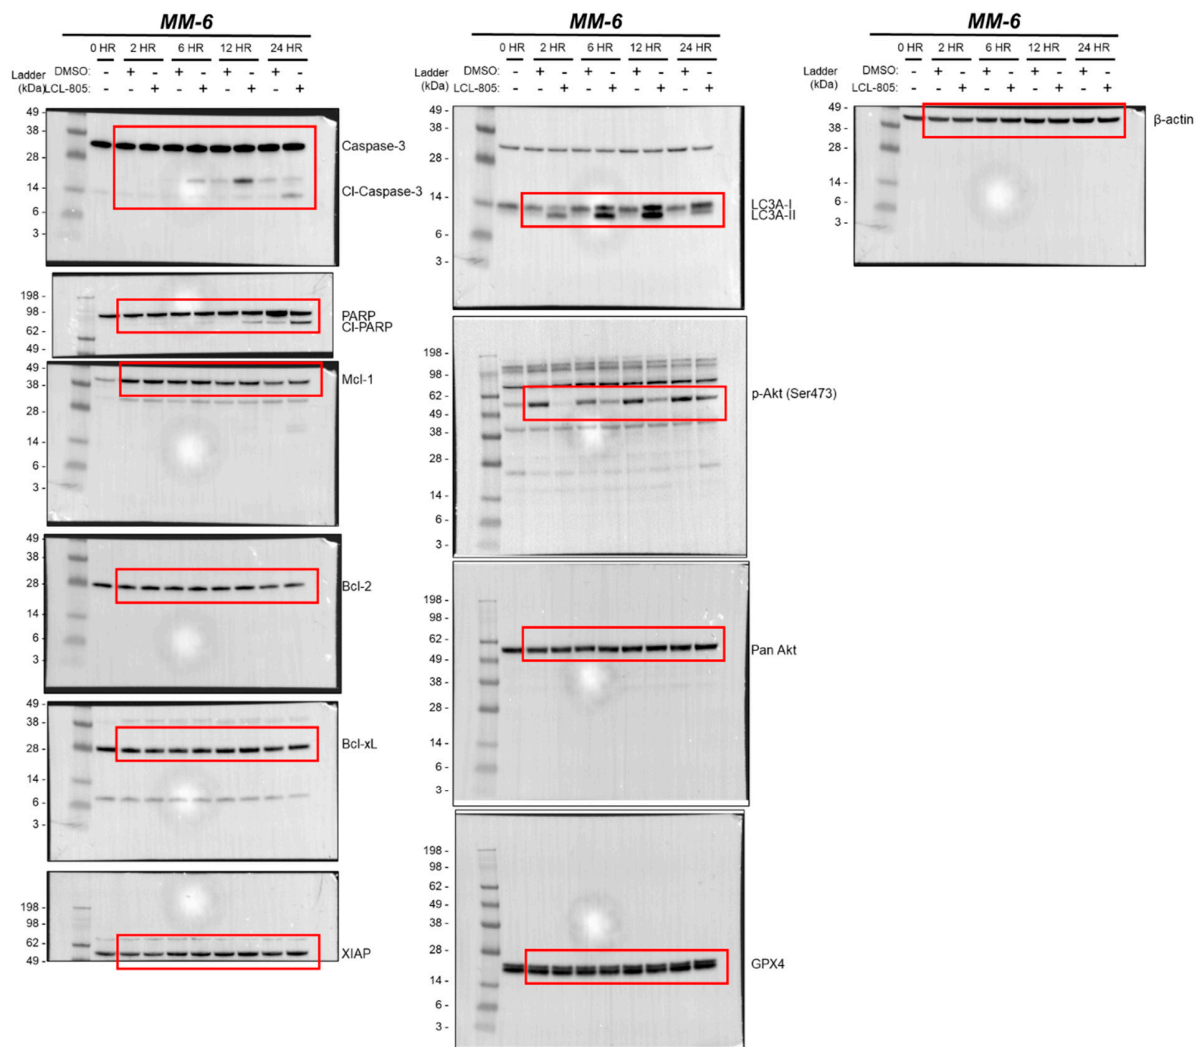

**Figure S12.** Full, annotated, unedited western blots for Figure 5A. Red boxes were cropped for the figure.

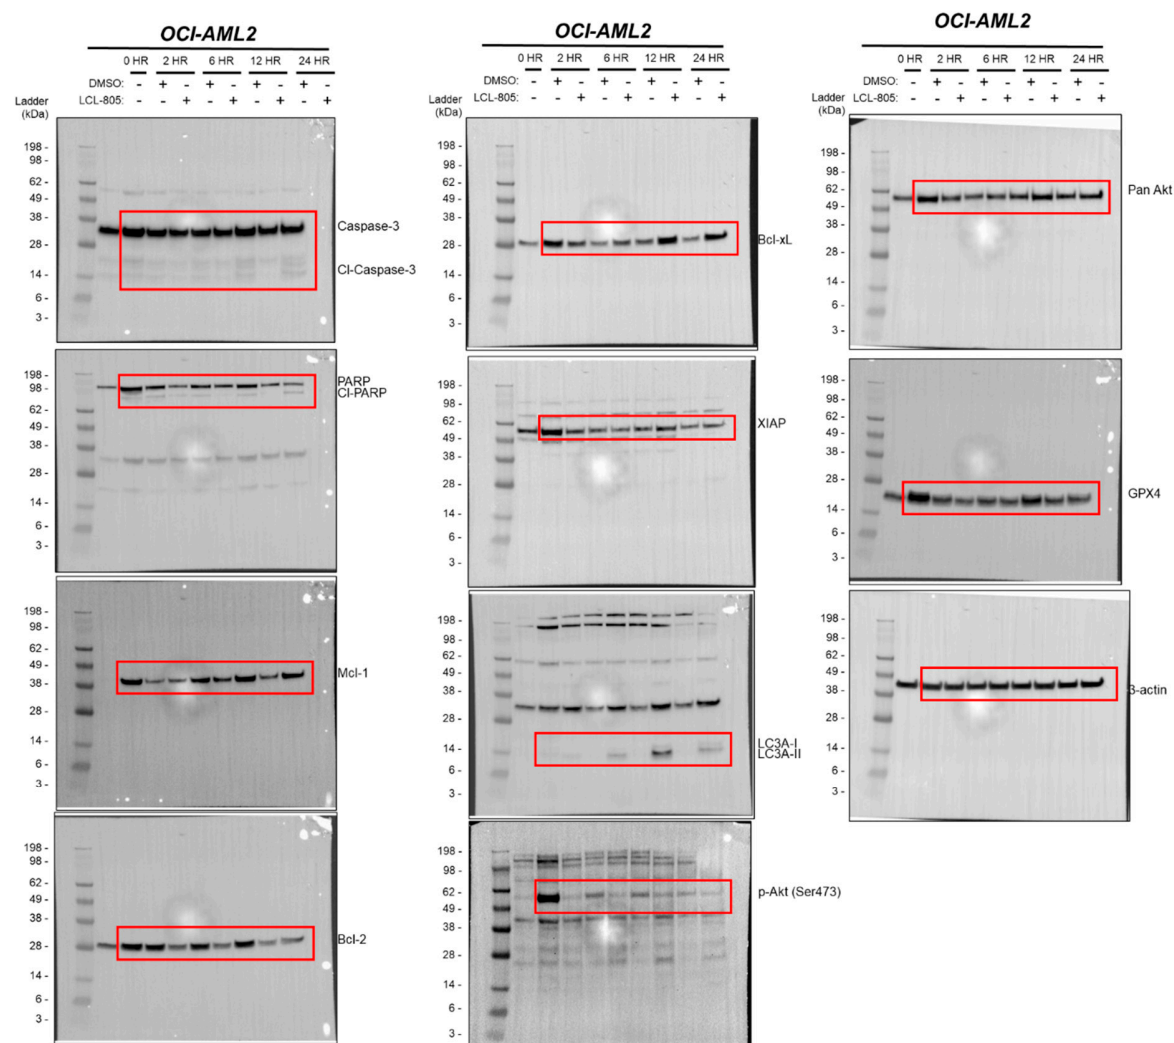

**Figure S13.** Full, annotated, unedited western blots for Figure 5B. Red boxes were cropped for the figure.

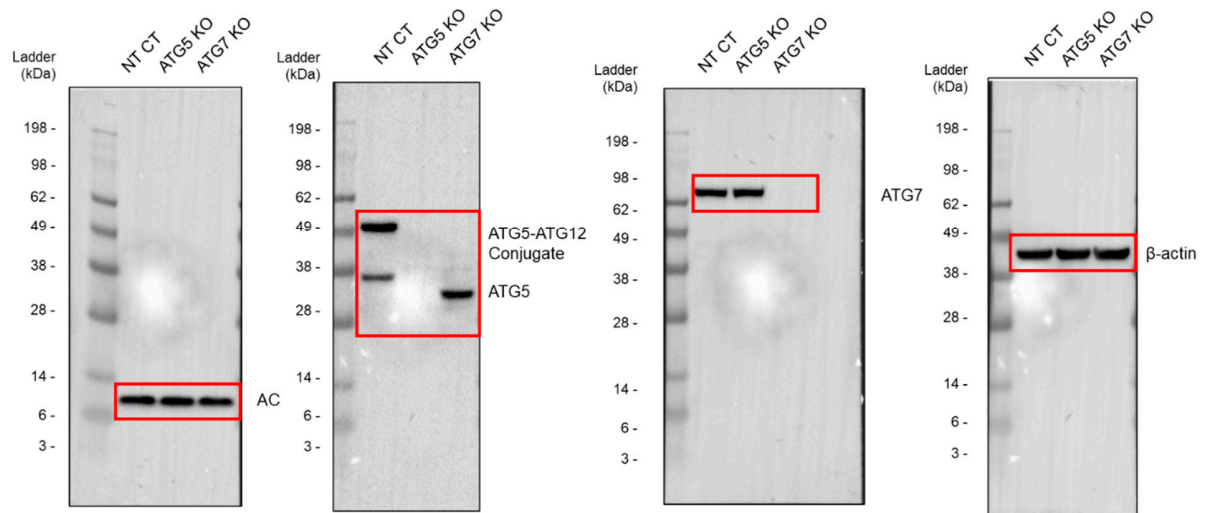

**Figure S14.** Full, annotated, unedited western blots for Figure 6G. Red boxes were cropped for the figure.



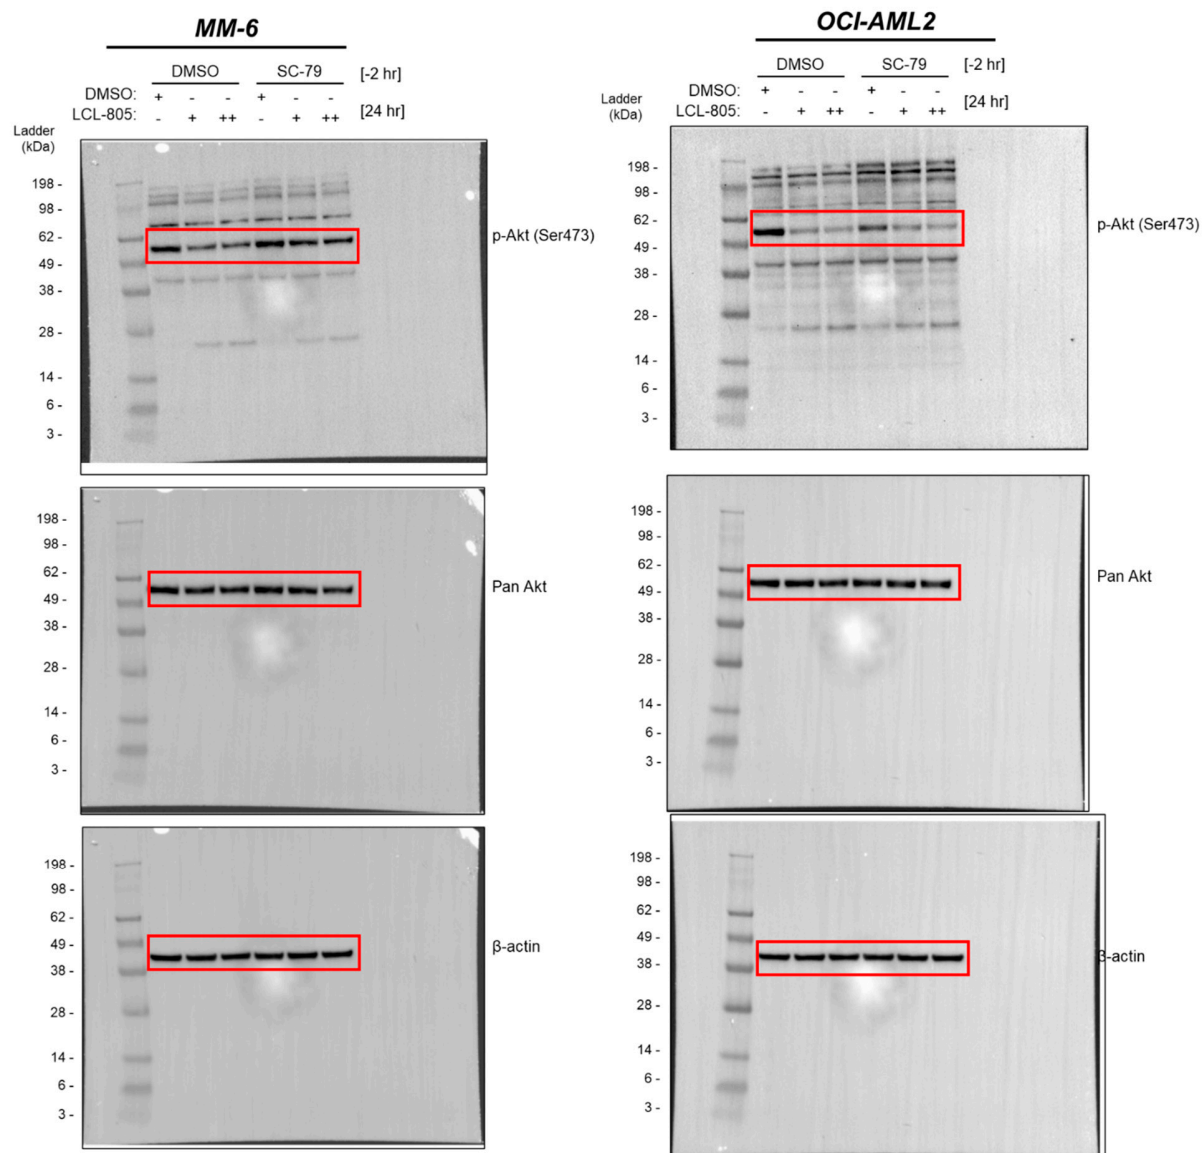

**Figure S15.** Full, annotated, unedited western blots for Figure 7C. Red boxes were cropped for the figure.

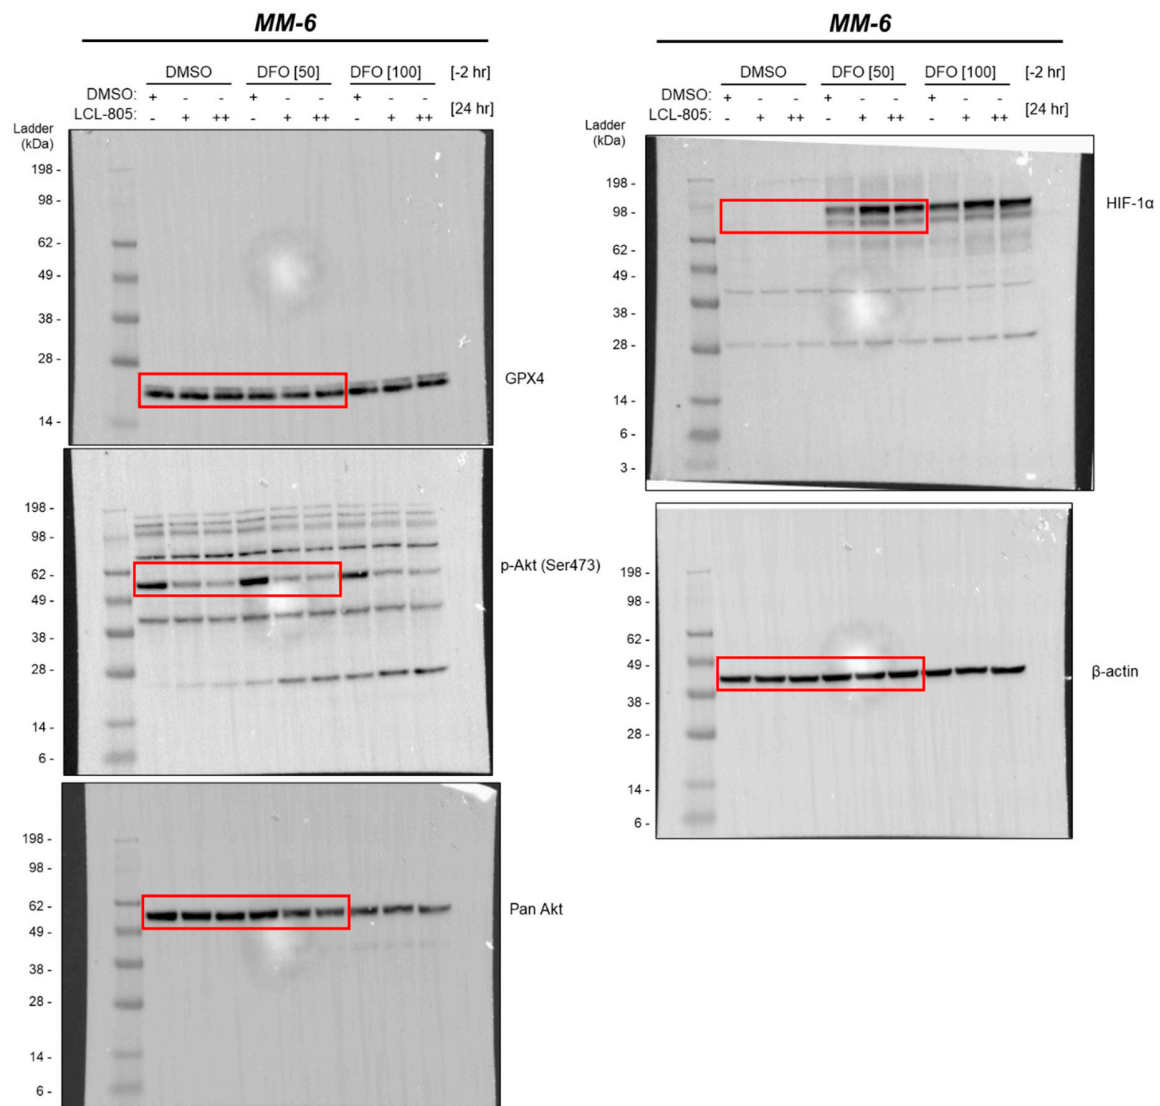

**Figure S16.** Full, annotated, unedited western blots for Figure 8G (MM-6). Red boxes were cropped for the figure.

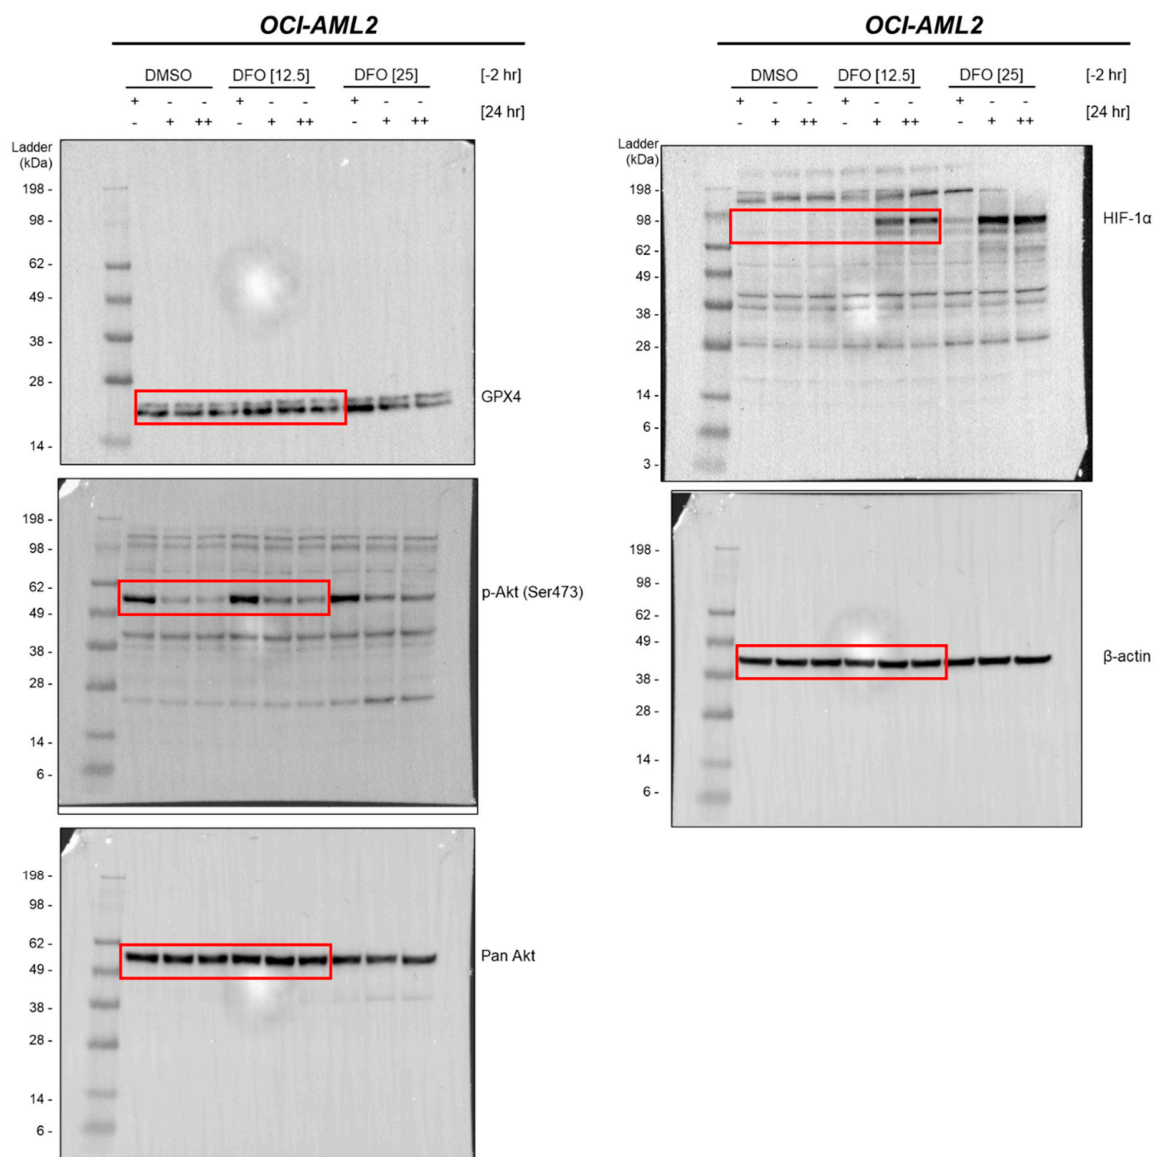

**Figure S17.** Full, annotated, unedited western blots for Figure 8G (OCI-AML2). Red boxes were cropped for the figure.

**Table S1.** AML patient sample cohort.

| ID  | Age  | Gender | Disease Stage | Sample Type | Blast % | Complete Cytogenetics          | LCL-805 EC50 (μM) | Notes |
|-----|------|--------|---------------|-------------|---------|--------------------------------|-------------------|-------|
| 134 | 60.5 | M      | Dx            | PBMC        | 5.0     | <i>Not Given</i>               | 15.8              |       |
| 150 | 52.0 | M      | Dx            | PBMC        | 85.0    | 46,XY                          | <i>Not Tested</i> |       |
| 215 | 74.6 | M      | Dx            | PBMC        | 94.0    | 44,XY,add(9)(p13),-16,-17,+mar | 14.4              |       |

|     |      |   |              |        |              |                                                     |             |                                                                                   |
|-----|------|---|--------------|--------|--------------|-----------------------------------------------------|-------------|-----------------------------------------------------------------------------------|
| 218 | 35.9 | F | Dx           | PBMC   | 94.0         | 46,XX                                               | Not Reached |                                                                                   |
| 245 | 48.0 | F | Dx           | PBMC   | 73.0         | 47,XX,+9                                            | 10.6        |                                                                                   |
| 329 | 71.6 | F | Dx           | PBMC   | 75.0         | 45,XX,inv(3)(q21q26.2),-7                           | 18.7        |                                                                                   |
| 591 | 52.7 | M | Rel>1        | PBMC   | Not Reported | 46,XY, del(5)(q15q33)                               | Not Reached |                                                                                   |
| 600 | 74.3 | F | Rel 1        | PBMC   | Not Reported | 46,XX                                               | Not Reached |                                                                                   |
| 601 | 70.5 | F | Dx           | PBMC   | 87.0         | 46,XY,ider(11)(q10)inv(11)(q13q25)                  | 18.0        |                                                                                   |
| 665 | 27.0 | M | Dx           | PBMC   | 58.0         | 46,XY,inv(16)(p13.1q22)                             | 10.9        | 665/667 derived from same patient; both PBMC samples collected at different dates |
| 667 | 27.0 | M | Dx           | PBMC   | 19.8         | 46,XY,inv(16)(p13.1q22)                             | 15.2        | 665/667 derived from same patient; both PBMC samples collected at different dates |
| 730 | 62.2 | M | Dx           | PBMC   | 25.5         | 46,XY                                               | 15.8        |                                                                                   |
| 739 | 58.5 | M | Dx           | PBMC   | 2.6          | 46,XY                                               | 17.9        |                                                                                   |
| 765 | 63.5 | M | Dx           | PBMC   | 77.0         | 47,XY,t(16;16)(p13.1;q22),+22                       | Not Reached |                                                                                   |
| 767 | 38.6 | F | Rel>1        | PBMC   | 24.0         | 46,XX                                               | Not Reached |                                                                                   |
| 772 | 55.1 | F | Dx           | PBMC   | 57.7         | 46,XX                                               | Not Reached |                                                                                   |
| 796 | 63.3 | M | Dx           | PBMC   | 85.0         | 45-47,X,-Y,der(1)t(1;3)(p36.1;p21),+7,r(16),-19,+20 | 13.4        |                                                                                   |
| 801 | 47.5 | M | Dx           | PBMC   | 22.4         | 46,XY                                               | Not Reached | 801/802 derived from same patient; 801 = PBMC; 802 = marrow                       |
| 802 | 47.5 | M | Dx           | Marrow | 43.0         | 46,XY                                               | Not Reached | 801/802 derived from same patient; 801 = PBMC; 802 = marrow                       |
| 807 | 28.7 | F | Receiving tx | PBMC   | 67.3         | 46,XX                                               | Not Reached |                                                                                   |
| 827 | 74.4 | M | Dx           | PBMC   | 93.0         | 46,XY                                               | 16.2        |                                                                                   |
| 841 | 76.7 | F | Dx           | PBMC   | 80.5         | 46,XX                                               | Not Reached |                                                                                   |
| 842 | 59.9 | M | Dx           | PBMC   | 87.0         | 46,XY                                               | 18.5        |                                                                                   |
| 850 | 60.3 | F | Dx           | PBMC   | 53.0         | 46,XX                                               | Not Reached |                                                                                   |
| 884 | 47.5 | M | Rel 1        | PBMC   | 77.0         | 46,XY                                               | 17.5        |                                                                                   |
| 933 | 58.2 | F | Dx           | PBMC   | 90.8         | 46,XX,t(8;21)(q22;q22),t(10;13)(q22;q12)            | Not Reached |                                                                                   |
| 934 | 71.6 | F | Dx           | PBMC   | 98.0         | 46,XX                                               | Not Reached |                                                                                   |
| 936 | 55.2 | M | Dx           | PBMC   | 37.7         | 44,XY,del(1)(q42),-7,add(8)(p23),-12                | Not Reached |                                                                                   |
| 939 | 44.8 | F | Dx           | PBMC   | 93.8         | 46,XX                                               | 18.6        |                                                                                   |
| 954 | 22.4 | M | Dx           | PBMC   | 68.0         | 46,XY                                               | 16.6        |                                                                                   |
| 967 | 41.8 | F | Dx           | PBMC   | 51.9         | 46,XX                                               | 15.8        |                                                                                   |

|           |      |   |    |        |      |                                                 |             |                                                                 |
|-----------|------|---|----|--------|------|-------------------------------------------------|-------------|-----------------------------------------------------------------|
| 976       | 64.1 | F | Dx | PBMC   | 65.4 | 46,XX                                           | Not Reached |                                                                 |
| 983       | 74.2 | F | Dx | PBMC   | 73.0 | 46,XX,add(9)(q13),hsr(9)(q13)                   | 15.7        |                                                                 |
| 990       | 66.1 | M | Dx | PBMC   | 61.5 | 46,XY,del(13)(q12q14)                           | Not Reached |                                                                 |
| 996       | 60.2 | M | Dx | PBMC   | 23.9 | 46,XY,inv(16)                                   | 14.9        |                                                                 |
| 997       | 66.1 | M | Dx | PBMC   | 87.7 | 47,XY,+21                                       | 15.0        |                                                                 |
| 1006      | 47.9 | M | Dx | PBMC   | 73.8 | 46,XY,add(5)(q31)                               | Not Reached |                                                                 |
| 1008      | 72.5 | M | Dx | PBMC   | 35.2 | 47,XY,+8,add(10)(p11.2),der(22)t(1;22)(q11;p13) | Not Reached |                                                                 |
| 1017      | 52.5 | M | Dx | PBMC   | 9.0  | 46,XY,t(3;21)(q26.2;q22)                        | 13.7        |                                                                 |
| 1020      | 58.9 | M | Dx | Marrow | 48.5 | 46,XY,t(6;9)(p23;q34),t(8;13;11)(q22;q12;q23)   | 18.5        | 1020/1021 derived from same patient; 1020 = marrow; 1021 = PBMC |
| 1021      | 58.9 | M | Dx | PBMC   | 79.9 | 46,XY,t(6;9)(p23;q34),t(8;13;11)(q22;q12;q23)   | Not Reached | 1020/1021 derived from same patient; 1020 = marrow; 1021 = PBMC |
| 1033      | 57.9 | F | Dx | PBMC   | 24.3 | 46,XX,del(6)(q21),add(17)(p13)                  | 16.6        |                                                                 |
| 1035      | 67.7 | M | Dx | PBMC   | 37.0 | 47,XY, +mar, Inv(3)(q21q26.2),-7                | Not Reached |                                                                 |
| 1044      | 70.1 | M | Dx | PBMC   | 63.8 | 46,XY,i(17)(q10)                                | Not Reached |                                                                 |
| 1048      | 61.1 | F | Dx | PBMC   | 24.5 | 46,XX                                           | 12.7        |                                                                 |
| 1065      | 65.2 | F | Dx | PBMC   | 35.0 | 46,XX,t(9;22)(q34;q11.2)                        | 11.6        |                                                                 |
| 1071      | 80.7 | M | Dx | PBMC   | 98.0 | 47,XY,+8                                        | 10.5        | 1071/1072 derived from same patient; 1071 = PBMC; 1072 = marrow |
| 1072      | 80.7 | M | Dx | Marrow | 73.0 | 47,XY,+8                                        | 19.1        | 1071/1072 derived from same patient; 1071 = PBMC; 1072 = marrow |
| 1080      | 55.8 | M | Dx | Marrow | 74.5 | 46,XY                                           | 14.6        | 1080/1082 derived from same patient; 1080 = marrow; 1082 = PBMC |
| 1081      | 58.4 | M | Dx | PBMC   | 95.0 | 46,XY                                           | 17.7        |                                                                 |
| 1082      | 55.8 | M | Dx | PBMC   | 9.4  | 46,XY                                           | Not Reached | 1080/1082 derived from same patient; 1080 = marrow; 1082 = PBMC |
| 1099      | 83.7 | M | Dx | PBMC   | 61.0 | 46,XY                                           | Not Reached |                                                                 |
| 1103      | 41.3 | F | Dx | PBMC   | 86.0 | 46,XX                                           | 14.4        |                                                                 |
| 1321      | 40.3 | F | Dx | PBMC   | 81.2 | 46,XX                                           | Not Reached |                                                                 |
| 1356      | 64.4 | M | Dx | PBMC   | 72.5 | 46,XY,inv(16)(p13.1q22)                         | 18.7        |                                                                 |
| 1361      | 58.8 | F | Dx | PBMC   | 90.0 | 46,XX                                           | Not Reached |                                                                 |
| 1374      | 36.5 | M | Dx | PBMC   | 86.7 | 46,XY,t(9;22)(q34;q11.2)                        | Not Reached |                                                                 |
| 1380      | 29.9 | M | Dx | PBMC   | 60.0 | 46,XY                                           | 12.7        |                                                                 |
| PBL 10005 | 75.0 | M | Dx | PBMC   | 89.5 | 46,XY                                           | 19.8        |                                                                 |

|           |      |   |    |      |                     |                                                    |                    |
|-----------|------|---|----|------|---------------------|----------------------------------------------------|--------------------|
| PBL 10016 | 71.0 | M | Dx | PBMC | <i>Not Reported</i> | 46,XY                                              | 16.8               |
| PBL 10173 | 64.0 | M | Dx | PBMC | 52.3                | 46,XY                                              | 19.3               |
| PBL 10215 | 72.0 | F | Dx | PBMC | 14.0                | 46,XX                                              | <i>Not Reached</i> |
| PBL 10261 | 66.0 | F | Dx | PBMC | 12.5                | 46,XX                                              | <i>Not Reached</i> |
| PBL 10278 | 59.0 | M | Dx | PBMC | 20.9                | 47,XY,+8,del(11)(q14q23),der(21)t(1;21)(q21;p11.2) | <i>Not Reached</i> |
| PBL 8231  | 56.0 | F | Dx | PBMC | 54.4                | 46,XX,der(11)del(11)(q23q23)t(11;17)(q23;q?25)     | 14.4               |
| PBL 8426  | 30.0 | F | Dx | PBMC | 84.0                | 46,XX,t(11;19)(q23;p13.1)                          | <i>Not Reached</i> |
| PBL 8870  | 68.0 | M | Dx | PBMC | 31.2                | 46,XY                                              | <i>Not Reached</i> |
| PBL 8934  | 67.0 | M | Dx | PBMC | 93.5                | 47,XY,+8,inv(16)(p13q22)                           | <i>Not Reached</i> |
| PBL 9097  | 50.0 | M | Dx | PBMC | 26.0                | 46,XY,inv(16)(p13.1q22)                            | 19.3               |
| PBL 9542  | 66.0 | M | Dx | PBMC | 56.0                | 45,XY,-7                                           | <i>Not Reached</i> |
| PBL 9785  | 61.0 | M | Dx | PBMC | 69.0                | 46,XY                                              | 18.4               |
| PBL 9948  | 61.0 | M | Dx | PBMC | 53.2                | 47,XY,+8,del(5)(q31q35)                            | <i>Not Reached</i> |
| PBL 9958  | 54.0 | M | Dx | PBMC | 69.0                | 48,XY,+9,+13                                       | <i>Not Tested</i>  |
